# Supplementary material for: Impact of Sinapic Acid on Bovine Serum Albumin Thermal Stability
Source: MDPI journal article supplement (doi:10.3390/ijms25020936), 2024-01-11
Supplement: s1 [file s1]

## **Supplementary Material**

### **Impact of sinapic acid on bovine serum albumin thermal stability**

Aurica Precupas and Vlad Tudor Popa\*

*“Ilie Murgulescu” Institute of Physical Chemistry of the Romanian Academy,  
202 Splaiul Independentei, Bucharest 060021, Romania*

\* Correspondence: [vtpopa@icf.ro](mailto:vtpopa@icf.ro)

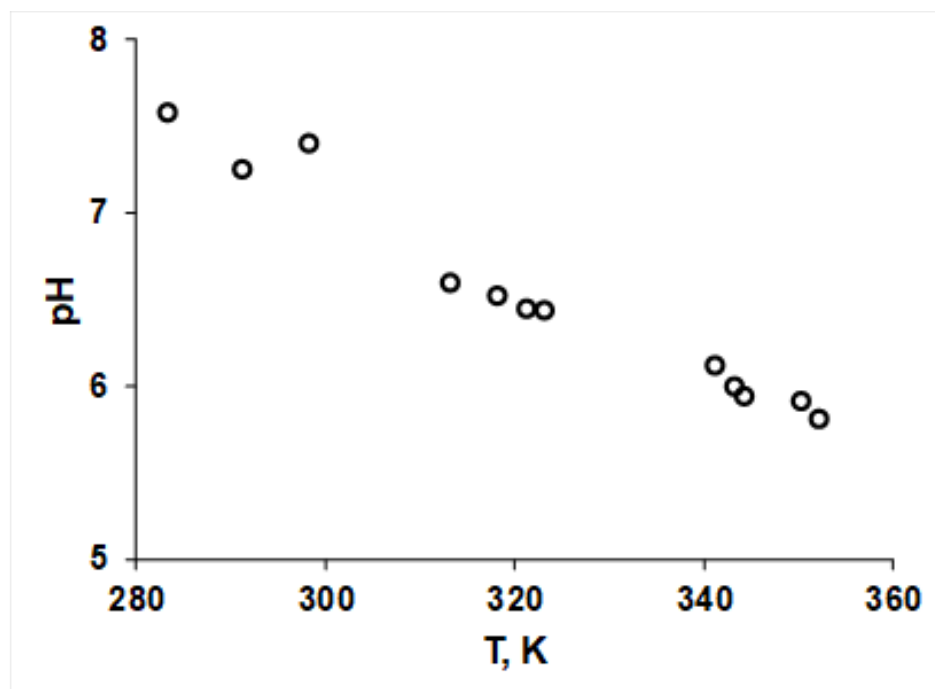

**Figure S1.** pH change with temperature for BSA solution in Tris buffer.

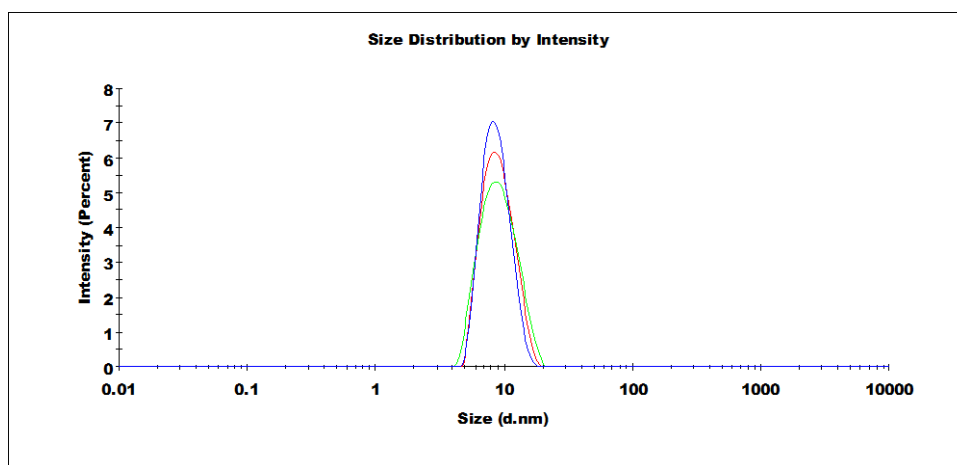

(A)

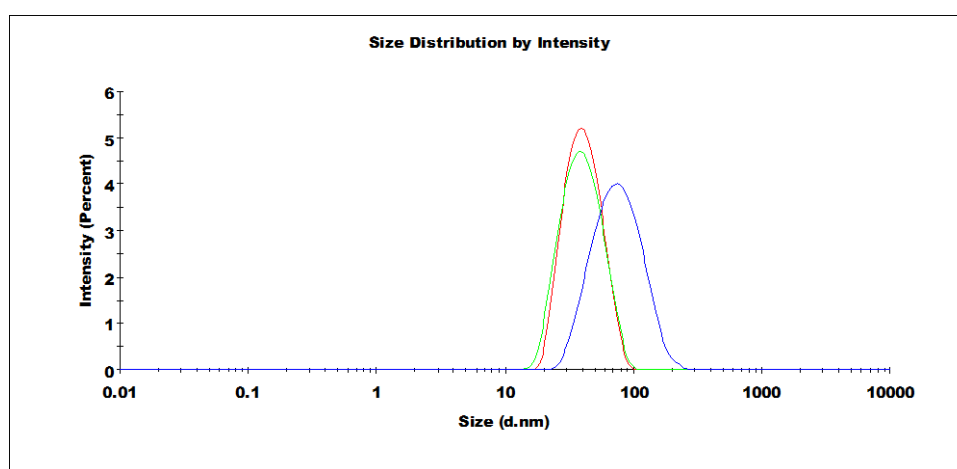

(B)

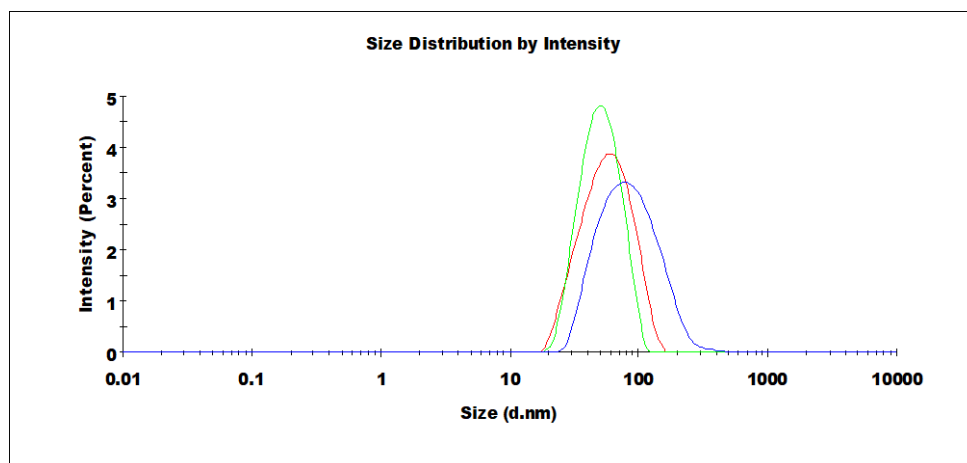

(C)

**Figure S2.** Size distribution by intensity for SA:BSA 0:1 (red line), SA:BSA 1:1 (green line), SA:BSA 10:1 (blue line) after (A) 24 hours at 277 K, (B) 20 hours at 338 K and (C) 48 hours at 338 K.

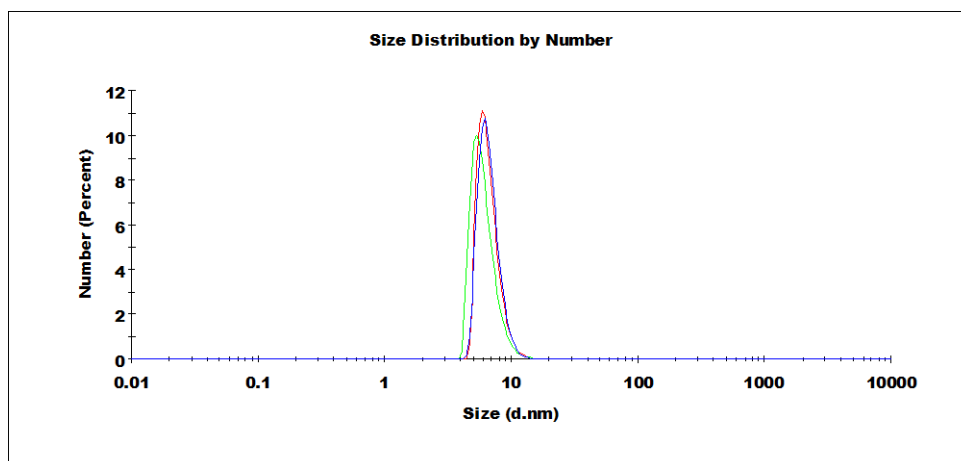

(A)

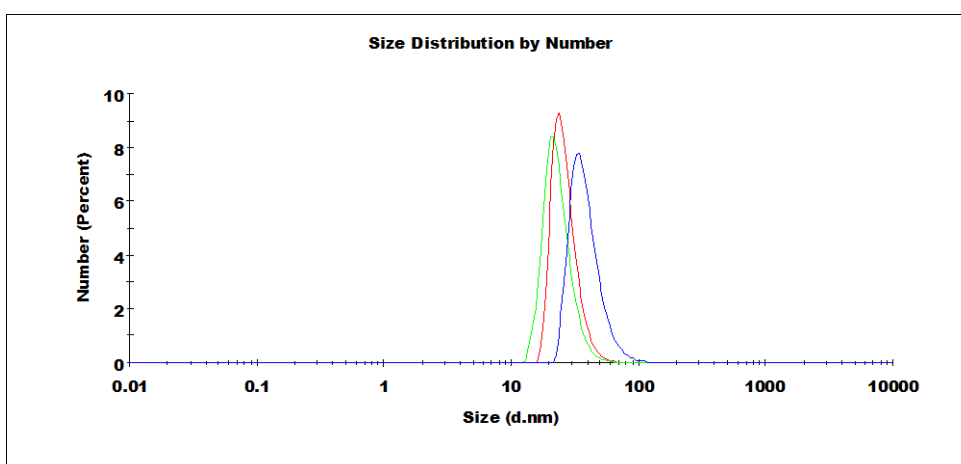

(B)

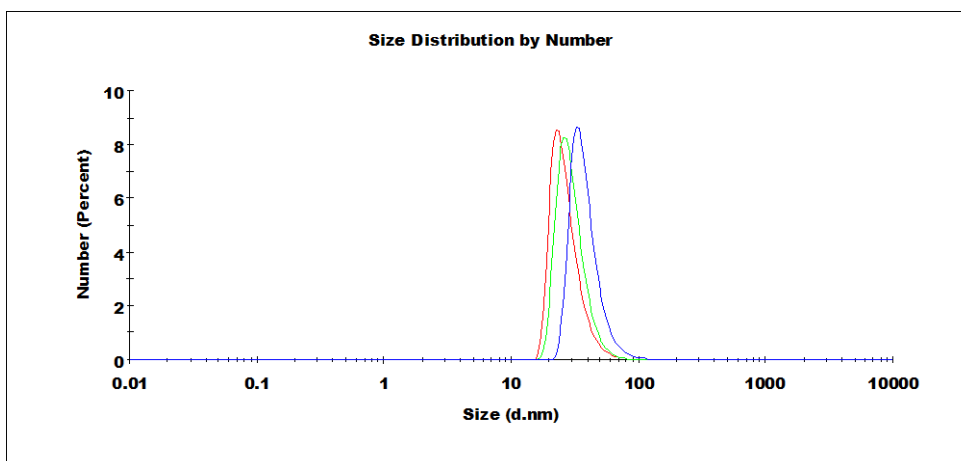

(C)

**Figure S3.** Size distribution by number for SA:BSA 0:1 (red line), SA:BSA 1:1 (green line), SA:BSA 10:1 (blue line) after (A) 24 hours at 277 K, (B) 20 hours at 338 K and (C) 48 hours at 338 K.

**Table 1.** The secondary structure content of protein in the absence and presence of SA evaluated using the K2D analysis algorithm from the Dichroweb website.

|               | <b>system</b> | <b>helix</b> | <b>strand</b> | <b>random coil</b> | <b>NRMSD</b> |
|---------------|---------------|--------------|---------------|--------------------|--------------|
| 24 h at 277 K | BSA           | 62           | 6             | 31                 | 0.113        |
|               | SA:BSA 1:1    | 69           | 3             | 27                 | 0.115        |
|               | SA:BSA 10:1   | 69           | 3             | 27                 | 0.131        |
| 20 h at 338 K | BSA           | 55           | 10            | 35                 | 0.145        |
|               | SA:BSA 1:1    | 58           | 8             | 34                 | 0.156        |
|               | SA:BSA 10:1   | 58           | 8             | 34                 | 0.155        |
| 48 h at 338 K | BSA           | 42           | 16            | 42                 | 0.139        |
|               | SA:BSA 1:1    | 42           | 15            | 43                 | 0.141        |
|               | SA:BSA 10:1   | 56           | 9             | 35                 | 0.160        |
